# Supplementary material
Source: MDPI journal article supplement (https://www.mdpi.com/2073-4441/14/4/662)
Supplement: s1 [file s1 › water-1565827-supplementary.pdf]

# Questionnaire on the application of Chinese and international technical standards in international hydropower projects<sup>1</sup>

## Project Profile

1. **Project Name:** \_\_\_\_\_
2. **The country where the project is located:** \_\_\_\_\_
3. **Whether the company has entered the market before doing the project:** ☐ Yes ☐ No
4. **The duration of the project:** \_\_\_\_\_
5. **The contract amount of the project:**  
☐ less than \$20 million    ☐ between \$20 million and \$50 million    ☐ between \$50 million and \$100 million  
☐ between \$100 million and \$500 million    ☐ more than \$500 million
6. **Sources of money (Multiple Choices):**  
☐ Owner's own funds ☐ Owner's loan from international financial institutions  
☐ Owner's loan from local or international commercial banks ☐ Export credit (loans from policy banks such as China Export-Import Bank)  
☐ Owner's loan from Chinese commercial banks ☐ Intergovernmental loans or assistance  
☐ Financing through PPP/BOT  
☐ Contract with capital  
☐ Others:
7. **The role of your company:** ☐ Designer ☐ Contractor ☐ Supplier ☐ Owner ☐ Consultant
8. **Your job title and position in this project:** \_\_\_\_\_
9. **How long have you been engaged in international construction projects:** \_\_\_\_\_

## Are the technical standards used in this project? (Multiple Choices)

- ☐ ISO ☐ IEC ☐ ITU ☐ IEEE ☐ ASTM ☐ ACI ☐ ASME ☐ ASCE ☐ USACE ☐ USBR ☐ AASHTO ☐ EN  
☐ BS ☐ DIN ☐ NF ☐ AS/NZS ☐ Chinese standards ☐ Others: \_\_\_\_\_

## The main differences between Chinese and international technical standards and the related impacts

1. **Are there any differences between the technical standards adopted in this project and Chinese technical standards? (1= no difference, 2= small difference, 3= neither big nor small difference, 4=big difference and 5= very big differences)**

|                                |   |   |   |   |   |
|--------------------------------|---|---|---|---|---|
| Philosophy of standards        | 1 | 2 | 3 | 4 | 5 |
| Logical structure of standards | 1 | 2 | 3 | 4 | 5 |

<sup>1</sup> This is part of the original questionnaire, which only contains the questions mentioned in this article

|                                     |   |   |   |   |   |
|-------------------------------------|---|---|---|---|---|
| Completeness of standards           | 1 | 2 | 3 | 4 | 5 |
| Application conditions of standards | 1 | 2 | 3 | 4 | 5 |
| Calculation methods                 | 1 | 2 | 3 | 4 | 5 |
| Construction methods                | 1 | 2 | 3 | 4 | 5 |
| Test methods                        | 1 | 2 | 3 | 4 | 5 |
| Equipment and material requirements | 1 | 2 | 3 | 4 | 5 |

2. Are these Problems related to unfamiliarity with differences between Chinese and foreign standards often happen in international hydropower project delivery? (1= never happened, 2= seldom happened, 3= sometimes happened, 4= often happened and 5=always happened)

|                                                                                   |   |   |   |   |   |
|-----------------------------------------------------------------------------------|---|---|---|---|---|
| Lack of ways to systematically learn foreign standards                            | 1 | 2 | 3 | 4 | 5 |
| Personnel could not appropriately use foreign standards                           | 1 | 2 | 3 | 4 | 5 |
| Incompletely understanding foreign standards                                      | 1 | 2 | 3 | 4 | 5 |
| Poor translation of foreign standards                                             |   |   |   |   |   |
| Project bidding and implementation with incomplete and outdated foreign standards | 1 | 2 | 3 | 4 | 5 |
| Technically and/or financially uncompetitive design for bidding                   | 1 | 2 | 3 | 4 | 5 |
| Design error or defect                                                            | 1 | 2 | 3 | 4 | 5 |
| Lack of design optimization                                                       | 1 | 2 | 3 | 4 | 5 |
| Low coordination efficiency between design, procurement and construction          | 1 | 2 | 3 | 4 | 5 |
| Poor constructability of designs                                                  | 1 | 2 | 3 | 4 | 5 |
| Design's low approval rate from consultants                                       | 1 | 2 | 3 | 4 | 5 |
| Poor communication with consultants                                               | 1 | 2 | 3 | 4 | 5 |
| Design delay                                                                      | 1 | 2 | 3 | 4 | 5 |
| Technically inappropriate procurement scheme                                      | 1 | 2 | 3 | 4 | 5 |
| Procurement scheme not cost-effective                                             | 1 | 2 | 3 | 4 | 5 |
| Choosing inappropriate suppliers                                                  | 1 | 2 | 3 | 4 | 5 |
| Construction delay                                                                | 1 | 2 | 3 | 4 | 5 |
| Construction cost increasing                                                      | 1 | 2 | 3 | 4 | 5 |
| Poor construction quality                                                         | 1 | 2 | 3 | 4 | 5 |
| Improper construction method                                                      | 1 | 2 | 3 | 4 | 5 |

**What are your views and suggestions on the application of international engineering construction standards?**
